# Supplementary material
Source: MDPI journal article supplement (https://www.mdpi.com/2072-4292/9/3/275)
Supplement: s1 [file s1]

Supplementary Data:

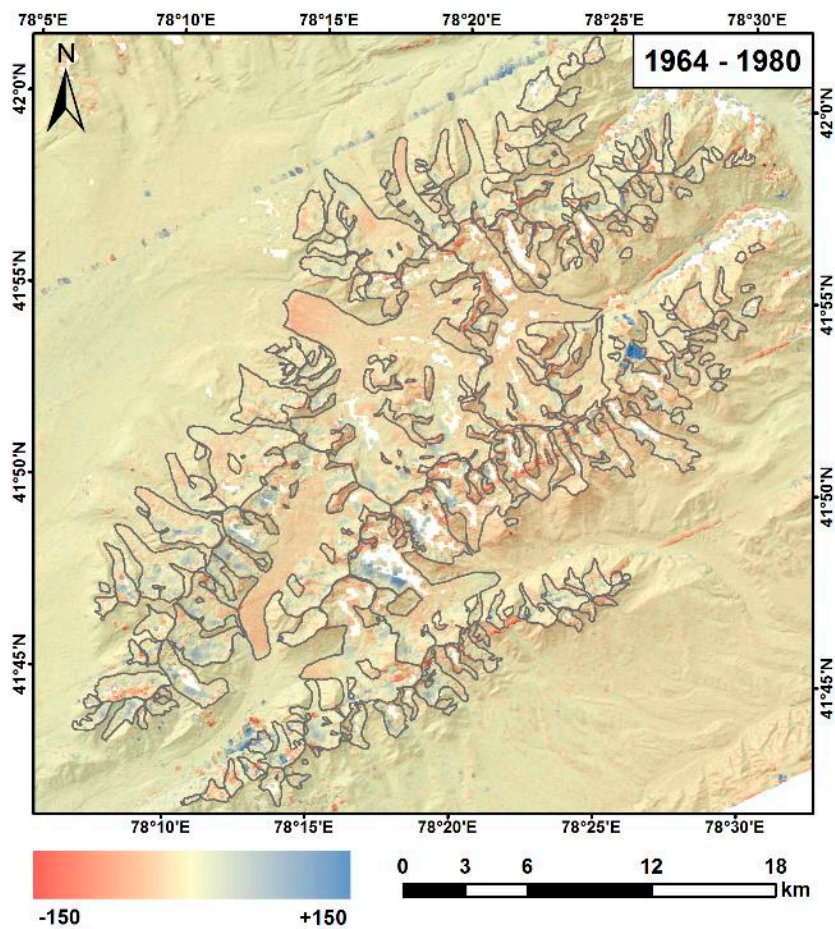

Figure S1. Elevation difference map for stable terrain and glaciers of the Ak-Shirak massif.

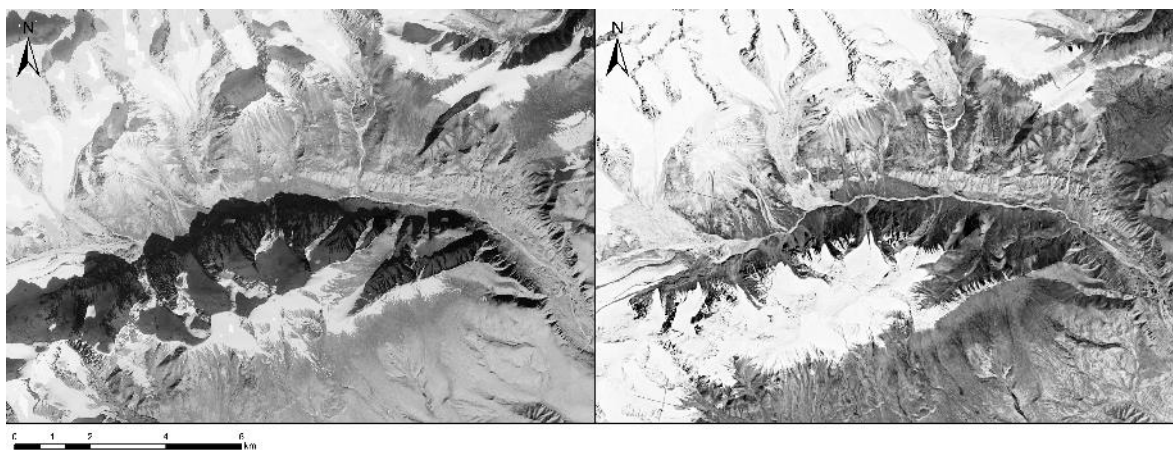

Figure S2. Snow cover comparison of the Kaindy valley in the south east of Ak-Shirak. Left image: Corona; Right image: Hexagon 1980.
